# Supplementary material
Source: PubMed Central journal article supplement (PMC7859878)
Supplement: jamapsychiatry-e204556-s001.pdf [file jamapsychiatry-e204556-s001.pdf]

## Supplementary Online Content

Singla DR, Lawson A, Kohrt BA, et al. Implementation and effectiveness of nonspecialist-delivered interventions for perinatal mental health in high-income countries: a systematic review and meta-analysis. *JAMA Psychiatry*. Published online February 3, 2021.  
doi:10.1001/jamapsychiatry.2020.4556

**eTable 1.** PRISMA Checklist

**eFigure 1.** Risk Assessment

**eTable 2.** Trial Characteristics, N = 46

**eTable 3.** Data Used to Calculate the Standardized Mean Difference and Standard Error for Each Outcome From Each Study, N = 44

**eFigure 2.** Forest Plot Examining a Subgroup Analysis of Outcome Tool (Diagnostic vs Self-Assessment)

**eFigure 3.** Forest Plot Examining a Subgroup Analysis of Age (Mixed Age vs Adult)

**eAppendix.** Leave-One-Out Analyses

**eReferences**

This supplementary material has been provided by the authors to give readers additional information about their work.

**eTable 1. PRISMA Checklist**

| Section/topic             | # | Checklist item                                                                                                                                                                                                                                                                                              | Reported on page # |
|---------------------------|---|-------------------------------------------------------------------------------------------------------------------------------------------------------------------------------------------------------------------------------------------------------------------------------------------------------------|--------------------|
| <b>TITLE</b>              |   |                                                                                                                                                                                                                                                                                                             |                    |
| Title                     | 1 | Identify the report as a systematic review, meta-analysis, or both.                                                                                                                                                                                                                                         | 1                  |
| <b>ABSTRACT</b>           |   |                                                                                                                                                                                                                                                                                                             |                    |
| Structured summary        | 2 | Provide a structured summary including, as applicable: background; objectives; data sources; study eligibility criteria, participants, and interventions; study appraisal and synthesis methods; results; limitations; conclusions and implications of key findings; systematic review registration number. | 2-3                |
| <b>INTRODUCTION</b>       |   |                                                                                                                                                                                                                                                                                                             |                    |
| Rationale                 | 3 | Describe the rationale for the review in the context of what is already known.                                                                                                                                                                                                                              | 5                  |
| Objectives                | 4 | Provide an explicit statement of questions being addressed with reference to participants, interventions, comparisons, outcomes, and study design (PICOS).                                                                                                                                                  | 5                  |
| <b>METHODS</b>            |   |                                                                                                                                                                                                                                                                                                             |                    |
| Protocol and registration | 5 | Indicate if a review protocol exists, if and where it can be accessed (e.g., Web address), and, if available, provide registration information including registration number.                                                                                                                               | 6                  |
| Eligibility criteria      | 6 | Specify study characteristics (e.g., PICOS, length of follow-up) and report characteristics (e.g., years considered, language, publication status) used as criteria for eligibility, giving rationale.                                                                                                      | 6                  |
| Information sources       | 7 | Describe all information sources (e.g., databases with dates of coverage, contact with study authors to identify additional studies) in the search and date last searched.                                                                                                                                  | 6                  |
| Search                    | 8 | Present full electronic search strategy for at least one database, including any limits used, such that it could be repeated.                                                                                                                                                                               | 6                  |
| Study selection           | 9 | State the process for selecting studies (i.e., screening, eligibility, included in systematic review, and, if applicable, included in the meta-analysis).                                                                                                                                                   | 6-7                |

|                                    |    |                                                                                                                                                                                                                        |         |
|------------------------------------|----|------------------------------------------------------------------------------------------------------------------------------------------------------------------------------------------------------------------------|---------|
| Data collection process            | 10 | Describe method of data extraction from reports (e.g., piloted forms, independently, in duplicate) and any processes for obtaining and confirming data from investigators.                                             | 6-7     |
| Data items                         | 11 | List and define all variables for which data were sought (e.g., PICOS, funding sources) and any assumptions and simplifications made.                                                                                  | Table 1 |
| Risk of bias in individual studies | 12 | Describe methods used for assessing risk of bias of individual studies (including specification of whether this was done at the study or outcome level), and how this information is to be used in any data synthesis. | 7       |
| Summary measures                   | 13 | State the principal summary measures (e.g., risk ratio, difference in means).                                                                                                                                          | 7       |
| Synthesis of results               | 14 | Describe the methods of handling data and combining results of studies, if done, including measures of consistency (e.g., $I^2$ ) for each meta-analysis.                                                              | 7       |

**eFigure 1. Risk Assessment**

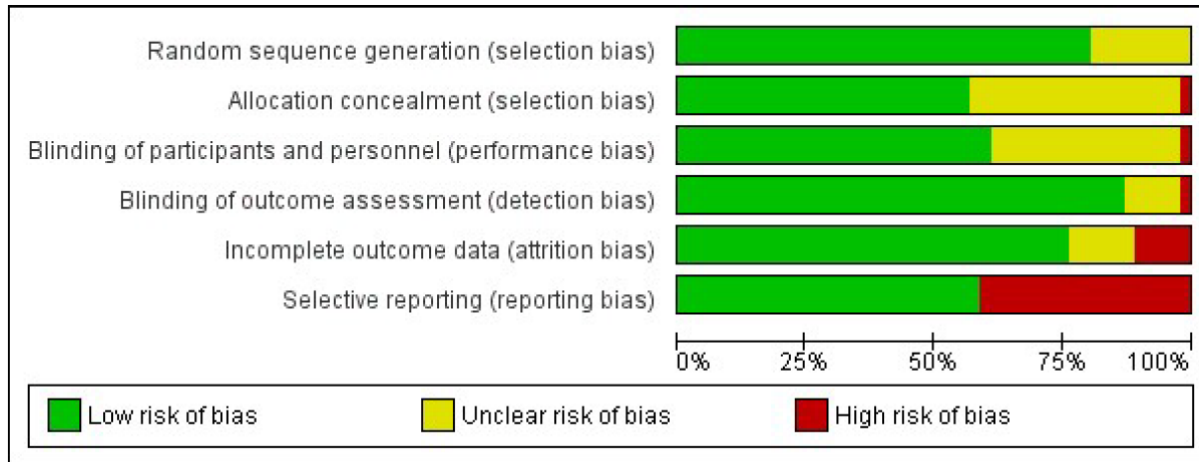

|                            | Random sequence generation (selection bias) | Allocation concealment (selection bias) | Blinding of participants and personnel (performance bias) | Blinding of outcome assessment (detection bias) | Incomplete outcome data (attrition bias) | Selective reporting (reporting bias) |
|----------------------------|---------------------------------------------|-----------------------------------------|-----------------------------------------------------------|-------------------------------------------------|------------------------------------------|--------------------------------------|
| Armstrong et al. 1999      | 6                                           | 7                                       | 6                                                         | 6                                               | 6                                        | 6                                    |
| Barnes et al. 2009         | 7                                           | 7                                       | 6                                                         | 6                                               | 6                                        | 6                                    |
| Brugha et al. 2000         | 6                                           | 6                                       | 6                                                         | 6                                               | 6                                        | 6                                    |
| Chen et al. 2000           | 7                                           | 7                                       | 7                                                         | 6                                               | 6                                        | 6                                    |
| Cooper et al. 2015         | 7                                           | 6                                       | 7                                                         | 6                                               | 6                                        | 6                                    |
| Dennis et al. 2009         | 6                                           | 7                                       | 6                                                         | 6                                               | 6                                        | 6                                    |
| Dimidjian et al. 2017      | 6                                           | 6                                       | 6                                                         | 6                                               | 6                                        | 6                                    |
| Field et al. 2013          | 7                                           | 7                                       | 7                                                         | 7                                               | 6                                        | 6                                    |
| Gagnon et al. 2002         | 7                                           | 7                                       | 7                                                         | 6                                               | 6                                        | 6                                    |
| Gamble et al. 2005         | 6                                           | 6                                       | 6                                                         | 6                                               | 6                                        | 6                                    |
| Giallo et al. 2014         | 6                                           | 6                                       | 6                                                         | 6                                               | 6                                        | 6                                    |
| Hagan et al. 2004          | 6                                           | 6                                       | 6                                                         | 6                                               | 6                                        | 6                                    |
| Hayes et al. 2001          | 6                                           | 6                                       | 7                                                         | 6                                               | 6                                        | 6                                    |
| Holden et al. 1989         | 6                                           | 7                                       | 6                                                         | 6                                               | 7                                        | 6                                    |
| Honey et al. 2002          | 6                                           | 7                                       | 7                                                         | 6                                               | 6                                        | 6                                    |
| Howell et al. 2012         | 6                                           | 7                                       | 6                                                         | 6                                               | 6                                        | 6                                    |
| Howell et al. 2014         | 6                                           | 7                                       | 7                                                         | 6                                               | 6                                        | 6                                    |
| Kenyon et al. 2016         | 6                                           | 6                                       | 7                                                         | 6                                               | 6                                        | 6                                    |
| Lavender & Walkinshaw 1998 | 6                                           | 6                                       | 6                                                         | 6                                               | 7                                        | 6                                    |
| Le et al. 2011             | 7                                           | 6                                       | 6                                                         | 7                                               | 6                                        | 6                                    |
| Letourneau et al. 2011     | 6                                           | 6                                       | 6                                                         | 6                                               | 6                                        | 6                                    |
| Lieu et al. 2000           | 6                                           | 6                                       | 7                                                         | 7                                               | 6                                        | 6                                    |
| MacArthur et al. 2002      | 6                                           | 6                                       | 6                                                         | 6                                               | 6                                        | 6                                    |
| Milgrom et al. 2011        | 6                                           | 7                                       | 7                                                         | 6                                               | 6                                        | 6                                    |
| Morrell et al. 2009a       | 6                                           | 6                                       | 6                                                         | 6                                               | 6                                        | 6                                    |
| O'Mahen et al. 2014        | 6                                           | 6                                       | 6                                                         | 6                                               | 6                                        | 6                                    |
| Prendergast & Austin 2001  | 6                                           | 7                                       | 6                                                         | 7                                               | 7                                        | 6                                    |
| Priest et al. 2003         | 6                                           | 6                                       | 6                                                         | 6                                               | 7                                        | 6                                    |
| Ravn et al. 2012           | 6                                           | 6                                       | 6                                                         | 6                                               | 6                                        | 6                                    |
| Reid et al. 2002           | 6                                           | 7                                       | 7                                                         | 6                                               | 6                                        | 6                                    |
| Saisto et al. 2001         | 6                                           | 6                                       | 7                                                         | 6                                               | 6                                        | 6                                    |
| Segre et al. 2015          | 6                                           | 7                                       | 7                                                         | 6                                               | 6                                        | 6                                    |
| Shields et al. 1997        | 7                                           | 6                                       | 7                                                         | 6                                               | 7                                        | 6                                    |
| Shorey et al. 2015         | 6                                           | 6                                       | 6                                                         | 6                                               | 6                                        | 6                                    |
| Shorey et al. 2019         | 6                                           | 6                                       | 6                                                         | 6                                               | 6                                        | 6                                    |
| Stamp et al. 1995          | 6                                           | 6                                       | 6                                                         | 6                                               | 6                                        | 6                                    |
| Taft et al. 2011           | 6                                           | 6                                       | 6                                                         | 6                                               | 6                                        | 6                                    |
| Tam et al. 2003            | 6                                           | 6                                       | 6                                                         | 6                                               | 6                                        | 6                                    |
| Toohill et al. 2014        | 6                                           | 7                                       | 6                                                         | 6                                               | 6                                        | 6                                    |
| Waldenstrom et al. 2000    | 6                                           | 6                                       | 7                                                         | 6                                               | 6                                        | 6                                    |
| Weis et al. 2017           | 6                                           | 7                                       | 7                                                         | 6                                               | 6                                        | 6                                    |
| Wickberg & Hwang 1996      | 7                                           | 7                                       | 6                                                         | 6                                               | 6                                        | 6                                    |
| Wiggins et al. 2005        | 6                                           | 6                                       | 6                                                         | 6                                               | 6                                        | 6                                    |
| Wiklund et al. 2010        | 7                                           | 7                                       | 6                                                         | 6                                               | 6                                        | 6                                    |
| Zlotnick et al. 2006       | 6                                           | 7                                       | 7                                                         | 7                                               | 7                                        | 6                                    |
| Zlotnick et al. 2016       | 6                                           | 6                                       | 6                                                         | 6                                               | 6                                        | 6                                    |

**eTable 2. Trial Characteristics, N=46**

| Reference                            | Secondary papers                     | Country        | Sample Size | Trial Design | Recruitment Setting | Intervention                                                        | Control Group                                                        | Type of NSP Provider               | Mental Health Outcome | Assessment Tool | Risk of Bias |
|--------------------------------------|--------------------------------------|----------------|-------------|--------------|---------------------|---------------------------------------------------------------------|----------------------------------------------------------------------|------------------------------------|-----------------------|-----------------|--------------|
| Armstrong et al. (1999) <sup>1</sup> | Armstrong et al. (2000) <sup>2</sup> | Australia      | 181         | RCT          | Primary Care        | 6 sessions of structured nurse home visiting                        | TAU + encouragement to use community child health service            | Nurse                              | Depression            | EPDS            | Low          |
| Barnes et al. (2009) <sup>3</sup>    | NA                                   | United Kingdom | 292         | Cluster RCT  | Primary Care        | Peer volunteer home visiting                                        | TAU                                                                  | Community member volunteers        | Depression            | SCID, EPDS      | Moderate     |
| Brugha et al. (2000) <sup>4</sup>    | Brugha et al. (1998) <sup>5</sup>    | United Kingdom | 209         | RCT          | Primary Care        | 6 structured group CBT+ psychoeducation sessions                    | TAU (routine antenatal care)                                         | Nurses and occupational therapists | Depression, anxiety   | EPDS, STAI      | Low          |
| Chen et al. (2000) <sup>6</sup>      | Chen et al. (1999) <sup>7</sup>      | Taiwan         | 60          | RCT          | Primary Care        | 4 weekly supportive group meetings                                  | TAU                                                                  | Nurse                              | Depression            | BDI             | High         |
| Cooper et al. (2015) <sup>8</sup>    | Cooper et al. (2003) <sup>9</sup>    | United Kingdom | 301         | RCT          | Primary Care        | 11 psychoeducation home visits targeting mother-infant relationship | TAU                                                                  | Health visitors                    | Depression            | EPDS, SCID      | Low          |
| Dennis et al. (2009) <sup>10</sup>   | Dennis (2003) <sup>11</sup>          | Canada         | 701         | RCT          | Primary Care        | 4 sessions of telephone-based peer support                          | TAU + community postpartum care resources and drop-in centers shared | Peers                              | Depression            | EPDS, SCID      | Low          |

|                                       |                                     |                |     |     |              |                                                       |                                                            |                                             |                     |                                         |          |
|---------------------------------------|-------------------------------------|----------------|-----|-----|--------------|-------------------------------------------------------|------------------------------------------------------------|---------------------------------------------|---------------------|-----------------------------------------|----------|
| Dimidjian et al. (2017) <sup>12</sup> | NA                                  | USA            | 163 | RCT | Primary Care | 10 sessions of BA                                     | TAU                                                        | Nurse, midwife, and occupational therapists | Depression, anxiety | PHQ-9, GAD-7                            | Low      |
| Field et al. (2013) <sup>13</sup>     | Field et al. (2009) <sup>14</sup>   | USA            | 44  | RCT | Primary Care | 12 sessions of IPT Group Therapy delivered by peers   | 12 sessions of IPT Group Therapy, delivered by specialists | Peers                                       | Depression          | CES-D                                   | High     |
| Gagnon et al. (2002) <sup>15</sup>    | NA                                  | Canada         | 586 | RCT | Primary Care | 1 Home visit follow up                                | TAU (standard clinic follow-ups post partum)               | Nurse                                       | Anxiety             | STAI                                    | Moderate |
| Gamble et al. (2005) <sup>16</sup>    | Gamble et al. (2009) <sup>17</sup>  | Australia      | 103 | RCT | Primary Care | 2 sessions of brief CBT-based counselling             | TAU                                                        | Midwife                                     | Depression, anxiety | EPDS, DASS-21                           | Low      |
| Giallo et al. (2014) <sup>18</sup>    | Dunning et al. (2013) <sup>19</sup> | Australia      | 202 | RCT | Primary Care | Psychoeducation + CBT with or without telephone calls | TAU                                                        | Maternal and child health nurses            | Depression, anxiety | DASS-21                                 | Low      |
| Hagan et al. (2004) <sup>20</sup>     | NA                                  | Australia      | 199 | RCT | Primary Care | 6 sessions of CBT                                     | TAU                                                        | Midwife                                     | Depression, Anxiety | SADS, EPDS, BDI, GHQ                    | Low      |
| Hayes et al. (2001) <sup>21</sup>     | NA                                  | Australia      | 206 | RCT | Primary Care | Psychoeducation Package                               | Not Reported                                               | Midwife or Research Assistant               | Depression          | POMS                                    | Low      |
| Holden et al. (1989) <sup>22</sup>    | Holden (1986) <sup>23</sup>         | Scotland       | 55  | RCT | Primary Care | 8 counselling visits                                  | TAU                                                        | Health Visitor                              | Depression          | Goldberg's Standardized Interview, EPDS | Moderate |
| Honey et al. (2002) <sup>24</sup>     | NA                                  | United Kingdom | 45  | RCT | Primary Care | 8 sessions of brief psychoed + CBT group              | TAU                                                        | Home health visitor                         | Depression          | EPDS                                    | Low      |

|                                            |                                                                         |                |      |             |                                                             |                                            |                                                               |                                |                     |                       |          |
|--------------------------------------------|-------------------------------------------------------------------------|----------------|------|-------------|-------------------------------------------------------------|--------------------------------------------|---------------------------------------------------------------|--------------------------------|---------------------|-----------------------|----------|
| Howell et al. (2014) <sup>25</sup>         | Howell et al. (2012) <sup>26</sup>                                      | USA            | 540  | RCT         | Primary Care                                                | Two step behavioural intervention          | Enhanced Treatment as Usual with routine postpartum education | Clinical research coordinators | Depression          | EPDS                  | Low      |
| Howell et al. (2012) <sup>26</sup>         | NA                                                                      | USA            | 540  | RCT         | Primary Care                                                | Two step behavioural intervention          | Enhanced Treatment as Usual with routine postpartum education | Bilingual research staff       | Depression          | EPDS                  | Moderate |
| Kenyon et al. (2016) <sup>27</sup>         | Kenyon et al. (2012) <sup>28</sup> ; Kenyon et al. (2017) <sup>29</sup> | United Kingdom | 1324 | RCT         | Primary Care                                                | Lay support pregnancy outreach program     | TAU (provision of referrals to midwives or other agencies)    | Pregnancy Outreach Worker      | Depression          | EPDS                  | Low      |
| Lavender & Walkinshaw (1998) <sup>30</sup> | NA                                                                      | United Kingdom | 114  | RCT         | Primary Care                                                | Postnatal midwife stress debriefing        | TAU                                                           | Midwife                        | Depression, Anxiety | HADS                  | Low      |
| Le et al. (2011) <sup>31</sup>             | Muñoz et al. (2007) <sup>32</sup>                                       | USA            | 217  | RCT         | Primary Care                                                | 8 Sessions of CBT-based group intervention | Not Reported                                                  | Bilingual Research Staff       | Depression          | BDI-II, Mood Screener | Low      |
| Letourneau et al. (2011) <sup>33</sup>     | NA                                                                      | Canada         | 60   | RCT         | Advertisements on radio, TV, and online media and referrals | Home-based peer support sessions           | 2 weeks of peer support after a 12- week waiting period       | Peer volunteers                | Depression          | EPDS                  | Low      |
| Lieu et al. (2000) <sup>34</sup>           | Escobar et al. (2001) <sup>35</sup>                                     | USA            | 1163 | RCT         | Primary Care                                                | Home Follow-Up Visit                       | TAU (Pediatric clinic visit within 48 hours of discharge)     | Nurse                          | Depression          | CES-D                 | Moderate |
| MacArthur et al. (2002) <sup>36</sup>      | NA                                                                      | United Kingdom | 2064 | Cluster RCT | Primary Care                                                | 6 sessions of Individualized               | TAU                                                           | Midwife                        | Depression          | EPDS                  | Low      |



|                                           |                                      |                |      |             |              | community-based care                                                |                                                        |                                      |                     |                      |              |
|-------------------------------------------|--------------------------------------|----------------|------|-------------|--------------|---------------------------------------------------------------------|--------------------------------------------------------|--------------------------------------|---------------------|----------------------|--------------|
| Milgrom et al. (2011) <sup>37</sup>       | NA                                   | Australia      | 68   | RCT         | Primary Care | 6 sessions of CBT                                                   | TAU                                                    | Nurse                                | Depression          | BDI-II               | Low          |
| Morrell et al. (2009a) <sup>38</sup>      | Morrell et al. (2009b) <sup>39</sup> | United Kingdom | 418  | Cluster RCT | Primary Care | Up to 10 CBT and PCA home visits in the first postnatal month       | TAU                                                    | Community health visits              | Depression, anxiety | EPDS, STAI           | Low          |
| O'Mahen et al. (2014) <sup>40</sup>       | O'Mahen et al. (2012) <sup>41</sup>  | United Kingdom | 83   | RCT         | Online       | 12 sessions of online BA                                            | TAU + access to Netmums chat room                      | Bachelor-level Mental health workers | Depression, anxiety | EPDS, GAD-7          | Low          |
| Prendergast & Austin (2001) <sup>42</sup> | NA                                   | Australia      | 37   | RCT         | Unknown      | 6 sessions of CBT                                                   | Enhanced Treatment as Usual + six weekly clinic visits | Nurse                                | Depression, Anxiety | EPDS, MADRS, DASS-21 | Insufficient |
| Priest et al. (2003) <sup>43</sup>        | NA                                   | Australia      | 1745 | RCT         | Primary Care | An individual stress debriefing session within 72 hours of delivery | TAU                                                    | Midwife                              | Depression          | EPDS                 | Low          |
| Ravn et al. (2012) <sup>44</sup>          | NA                                   | Norway         | 106  | RCT         | Primary Care | 11 sessions of the Mother-Infant Transaction program                | TAU                                                    | Nurse                                | Depression          | CES-D                | Low          |
| Reid et al. (2002) <sup>45</sup>          | NA                                   | Scotland       | 1004 | RCT         | Primary Care | Psychoeducation Support Group                                       | TAU                                                    | Midwife                              | Depression          | EPDS                 | Low          |

|                                     |                                                           |           |      |             |              |                                                                       |                                                                 |                                    |                     |                              |          |
|-------------------------------------|-----------------------------------------------------------|-----------|------|-------------|--------------|-----------------------------------------------------------------------|-----------------------------------------------------------------|------------------------------------|---------------------|------------------------------|----------|
| Saisto et al. (2001) <sup>46</sup>  | NA                                                        | Finland   | 176  | RCT         | Primary Care | 5 CT sessions                                                         | TAU (routine obstetric check-ups)                               | Midwife and Family Physician       | Depression, anxiety | BDI, Pregnancy Anxiety Scale | Low      |
| Segre et al. (2015) <sup>47</sup>   | Brock et al. (2017) <sup>48</sup>                         | USA       | 66   | RCT         | Primary Care | 6 sessions of listening visits                                        | Wait-list Control Group                                         | Community Health Worker            | Depression, anxiety | EPDS, IDAS-GD, HRSD          | Moderate |
| Shields et al. (1997) <sup>49</sup> | Turnbull et al. (1995) <sup>50</sup>                      | Scotland  | 1299 | RCT         | Primary Care | Midwife managed care                                                  | Not Reported                                                    | Midwife                            | Depression          | EPDS                         | Moderate |
| Shorey et al. (2015) <sup>51</sup>  | Shorey et al. (2015) <sup>52</sup>                        | Singapore | 122  | RCT         | Primary Care | Postnatal psychoeducation home visit and weekly follow up phone calls | TAU (routine postnatal appointments)                            | Midwife                            | Depression          | EPDS                         | Low      |
| Shorey et al., 2019 <sup>53</sup>   | Shorey et al., 2018 <sup>54</sup>                         | Singapore | 138  | RCT         | Primary Care | 4-week peer support intervention                                      | TAU (routine postnatal care)                                    | Peer                               | Depression, anxiety | EPDS, PHQ-9, STAI            | Low      |
| Stamp et al. (1995) <sup>55</sup>   | NA                                                        | Australia | 144  | RCT         | Primary Care | 3 sessions of non-directive support                                   | TAU                                                             | Midwife                            | Depression          | EPDS                         | Low      |
| Taft et al. (2011) <sup>56</sup>    | Taft et al. (2003; 2009) <sup>57</sup>                    | Australia | 174  | Cluster RCT | Primary Care | 4 sessions of mentor support                                          | TAU                                                             | Nurse, Family Physician, and Peers | Depression          | EPDS                         | Low      |
| Tam et al. (2003) <sup>58</sup>     | NA                                                        | Hong Kong | 516  | RCT         | Primary Care | Educational counselling sessions                                      | TAU (routine postnatal clinic follow-ups at 6 weeks postpartum) | Nurse                              | Depression, anxiety | HADS                         | Low      |
| Toohill et al. (2014) <sup>59</sup> | Fenwick et al. (2013 <sup>60</sup> ; 2015 <sup>61</sup> ) | Australia | 339  | RCT         | Primary Care | 2 sessions of psychoeducation                                         | TAU                                                             | Midwife                            | Depression          | EPDS                         | Low      |

|                                         |    |                |      |     |              |                                            |                                                          |                                          |                     |               |              |
|-----------------------------------------|----|----------------|------|-----|--------------|--------------------------------------------|----------------------------------------------------------|------------------------------------------|---------------------|---------------|--------------|
| Waldenström et al. (2000) <sup>62</sup> | NA | Australia      | 1000 | RCT | Primary Care | Team midwife support                       | TAU (standard birth centre and midwifery care)           | Midwife                                  | Depression          | EPDS          | Low          |
| Weis et al. (2017) <sup>63</sup>        | NA | USA            | 367  | RCT | Primary Care | 8 sessions of peer support                 | TAU                                                      | Peers                                    | Depression, anxiety | EPDS, PSEQ-SF | Low          |
| Wickberg & Hwang (1996) <sup>64</sup>   | NA | Sweden         | 48   | RCT | Primary Care | 6 Counselling sessions provided by nurses  | TAU                                                      | Midwife                                  | Depression          | MADRS         | Moderate     |
| Wiggins et al. (2005) <sup>65</sup>     | NA | United Kingdom | 731  | RCT | Primary Care | 12 monthly supportive listening visits     | TAU (Routine health visiting services)                   | Health Visitors                          | Depression          | EPDS, GHQ     | Low          |
| Wiklund et al. (2010) <sup>66</sup>     | NA | Sweden         | 67   | RCT | Primary Care | 3 sessions of CBT sessions                 | TAU + one debriefing session with a midwife/obstetrician | Midwife                                  | Depression          | EPDS          | High         |
| Zlotnick et al. (2006) <sup>67</sup>    | NA | USA            | 99   | RCT | Primary Care | 4 group IPT sessions                       | TAU (standard antenatal care)                            | Nurse                                    | Depression          | BDI, LIFE     | Insufficient |
| Zlotnick et al. (2016) <sup>68</sup>    | NA | USA            | 205  | RCT | Primary Care | 4 group IPT-based psychoeducation sessions | TAU (standard antenatal care)                            | Nurse and post-bachelor's research staff | Depression          | LIFE          | Low          |

Note. CT=cognitive therapy; CBT=cognitive behavioral therapy; IPT=interpersonal therapy; RCT=randomized controlled trial; TAU=treatment as usual; BDI=Beck Depression Inventory; BDI-II=Beck Depression Inventory II; CES-D=Center for Epidemiologic Studies Depression Scale; DASS-21=Depression Anxiety and Stress Scale – 21; EPDS=Edinburgh Postnatal Depression Scale; GAD-7=General Anxiety Disorder – 7; GHQ=General Health Questionnaire; HADS: Hospital Anxiety and Depression Scale; HRSD=Hamilton Rating Scale for Depression; IDAS-GD=General Depression Scale of the Inventory of Depression and Anxiety Symptoms; LIFE=Longitudinal Interval Follow-up Examination; MADRS=Montgomery-Asberg Depression Rating Scale; PHQ-9=Patient Health Questionnaire – 9; POMS=Profile of Mood States; PSEQ-SF=Prenatal Self-Evaluation Questionnaire – Short Form; SADS=Schedule for Affective Disorders and Schizophrenia; SCID=Structured Interview for Diagnostic and Statistical Manual; STAI=State Trait Anxiety Inventory

**eTable 3. Data Used to Calculate the Standardized Mean Difference and Standard Error for Each Outcome From Each Study, N=44**

| Study                                      | Outcome    | Intervention Group    |                      |                   | Control Group         |                      |                   | Effect Size         |            |
|--------------------------------------------|------------|-----------------------|----------------------|-------------------|-----------------------|----------------------|-------------------|---------------------|------------|
|                                            |            | Effective Sample Size | Mean                 | SD                | Effective Sample Size | Mean                 | SD                | Std Mean Difference | Std. Error |
| Armstrong et al. (1999) <sup>1</sup>       | Depression | 86                    | 5.67                 | 4.14              | 88                    | 7.9                  | 5.89              | 0.44                | 0.15       |
| Barnes et al. (2009) <sup>3</sup>          | Depression | 68 <sup>A</sup>       | 7                    | 5.9               | 68 <sup>A</sup>       | 6.3                  | 5.5               | -0.12               | 0.17       |
| Brugha et al. (2000) <sup>4</sup>          | Depression | 94                    | 24/94 <sup>B</sup>   |                   | 96                    | 21/96 <sup>B</sup>   |                   | -0.12               | 0.19       |
| Chen et al. (2000) <sup>6</sup>            | Depression | 30                    | 10/30 <sup>B</sup>   |                   | 30                    | 18/30 <sup>B</sup>   |                   | 0.61                | 0.29       |
| Cooper et al. (2015) <sup>8</sup>          | Depression | 82                    | 7.4                  | 4.66              | 83                    | 7.6                  | 4.77              | 0.04                | 0.16       |
| Dennis et al. (2009) <sup>10</sup>         | Depression | 297                   | 7.93                 | 4.68              | 315                   | 8.89                 | 5.24              | 0.19                | 0.08       |
|                                            | Anxiety    | 297                   | 35.1                 | 11.85             | 315                   | 36.88                | 12.85             | 0.14                | 0.08       |
| Dimidjian et al. (2017) <sup>12</sup>      | Depression | 70                    | 8.76                 | 5.39              | 68                    | 10.46                | 4.71              | 0.33                | 0.17       |
|                                            | Anxiety    | 70                    | 8.07                 | 5.5               | 68                    | 10.87                | 4.84              | 0.54                | 0.17       |
| Gagnon et al. (2002) <sup>15</sup>         | Anxiety    | 259                   | 28.7                 | 7.9               | 253                   | 28.4                 | 8                 | -0.04               | 0.09       |
| Gamble et al. (2005) <sup>16</sup>         | Depression | 50                    | 4/50 <sup>B</sup>    |                   | 53                    | 17/53 <sup>B</sup>   |                   | 0.95                | 0.37       |
|                                            | Anxiety    | 50                    | 1/50 <sup>B</sup>    |                   | 53                    | 6/53 <sup>B</sup>    |                   | 1.01                | 0.61       |
| Giallo et al. (2014) <sup>18</sup>         | Depression | 45                    | 3.07                 | 4.05              | 59                    | 5.24                 | 7.01              | 0.37                | 0.19       |
|                                            | Anxiety    | 45                    | 1.8                  | 3.03              | 59                    | 3.07                 | 3.54              | 0.3                 | 0.19       |
| Hagan et al. (2004) <sup>20</sup>          | Depression | 87                    | 29/87 <sup>B</sup>   |                   | 89                    | 25/89 <sup>B</sup>   |                   | -0.14               | 0.18       |
| Hayes et al. (2001) <sup>21</sup>          | Depression | 95                    | 5 <sup>C</sup>       | 1.83 <sup>C</sup> | 93                    | 4 <sup>C</sup>       | 1.17 <sup>C</sup> | -0.66               | 0.15       |
| Holden et al. (1989) <sup>22</sup>         | Depression | 26                    | 10.5 <sup>C</sup>    | 1.18 <sup>C</sup> | 24                    | 12 <sup>C</sup>      | 1.18 <sup>C</sup> | 1.25                | 0.31       |
| Honey et al. (2002) <sup>24</sup>          | Depression | 23                    | 14.87                | 5.97              | 24                    | 16.95                | 5.44              | 0.36                | 0.3        |
| Howell et al. (2014) <sup>25</sup>         | Depression | 249                   | 15/249 <sup>B</sup>  |                   | 251                   | 14/251 <sup>B</sup>  |                   | -0.05               | 0.21       |
| Howell et al. (2012) <sup>26</sup>         | Depression | 227                   | 20/227 <sup>B</sup>  |                   | 242                   | 37/242 <sup>B</sup>  |                   | 0.35                | 0.16       |
| Kenyon et al. (2016) <sup>27</sup>         | Depression | 519                   | 6.76                 | 0.23 <sup>D</sup> | 489                   | 7.35                 | 0.24 <sup>D</sup> | 0.11                | 0.06       |
| Lavender & Walkinshaw (1998) <sup>30</sup> | Depression | 58                    | 5/58 <sup>B</sup>    |                   | 56                    | 31/56 <sup>B</sup>   |                   | 1.42                | 0.3        |
|                                            | Anxiety    | 58                    | 4/58 <sup>B</sup>    |                   | 56                    | 28/56 <sup>B</sup>   |                   | 1.44                | 0.32       |
| Le et al. (2011) <sup>31</sup>             | Depression | 94                    | 10.56                | 7.76              | 92                    | 12.66                | 9.56              | 0.24                | 0.15       |
| Letourneau et al. (2011) <sup>33</sup>     | Depression | 28                    | 11.8                 | 4.68              | 23                    | 8.68                 | 5.44              | -0.6                | 0.29       |
| Lieu et al. (2000) <sup>34</sup>           | Depression | 580                   | 126/580 <sup>B</sup> |                   | 583                   | 123/583 <sup>B</sup> |                   | -0.02               | 0.08       |
| MacArthur et al. (2002) <sup>36</sup>      | Depression | 569                   | 6.40                 | 8.18 <sup>E</sup> | 499                   | 8.06                 | 8.19 <sup>E</sup> | 0.2                 | 0.06       |
| Milgrom et al. (2011) <sup>37</sup>        | Depression | 22                    | 6.1                  | 4.8               | 23                    | 11.8                 | 9.8               | 0.72                | 0.31       |
| Morrell et al. (2009a) <sup>38</sup>       | Depression | 196 <sup>A</sup>      | 9.2                  | 5.4               | 106 <sup>A</sup>      | 11.3                 | 5.8               | 0.38                | 0.1        |
|                                            | Anxiety    | 196 <sup>A</sup>      | 41.7                 | 11.8              | 106 <sup>A</sup>      | 45.5                 | 12.5              | 0.31                | 0.12       |
| O'Mahen et al. (2014) <sup>40</sup>        | Depression | 41                    | 11.05                | 4.71              | 42                    | 14.26                | 5.11              | 0.65                | 0.24       |

|                                           |            |                 |                      |       |                 |                      |       |       |      |
|-------------------------------------------|------------|-----------------|----------------------|-------|-----------------|----------------------|-------|-------|------|
|                                           | Anxiety    | 41              | 8.71                 | 4.61  | 42              | 11.29                | 5.49  | 0.5   | 0.22 |
| Prendergast & Austin (2001) <sup>42</sup> | Depression | 17              | 8.1                  | 2.9   | 20              | 6.5                  | 6.2   | -0.3  | 0.33 |
| Priest et al. (2003) <sup>43</sup>        | Depression | 870             | 318/870 <sup>B</sup> |       | 875             | 311/875 <sup>B</sup> |       | 0.02  | 0.07 |
| Ravn et al. (2012) <sup>44</sup>          | Depression | 43              | 8.3                  | 5.1   | 44              | 10.9                 | 6.7   | 0.43  | 0.22 |
| Reid et al. (2002) <sup>45</sup>          | Depression | 344             | 6.1                  | 5.17  | 388             | 5.8                  | 4.49  | -0.06 | 0.07 |
| Segre et al. (2015) <sup>47</sup>         | Depression | 41              | 11.03                | 7.3   | 25              | 14.29                | 8.19  | 0.42  | 0.26 |
| Shields et al. (1997) <sup>49</sup>       | Depression | 426             | 8.1                  | 4.9   | 362             | 9                    | 4.9   | 0.18  | 0.07 |
| Shorey et al. (2015) <sup>51</sup>        | Depression | 56              | 6.8                  | 2.7   | 54              | 10.6                 | 2.9   | 1.35  | 0.21 |
| Shorey et al. (2019) <sup>53</sup>        | Depression | 54              | 9.8                  | 2.2   | 57              | 12                   | 2.3   | 0.97  | 0.20 |
|                                           | Anxiety    | 50              | 79.8                 | 11.3  | 52              | 87.7                 | 11.3  | 0.69  | 0.20 |
| Stamp et al. (1995) <sup>55</sup>         | Depression | 64              | 8/64 <sup>B</sup>    |       | 64              | 11/64 <sup>B</sup>   |       | 0.21  | 0.28 |
| Taft et al. (2011) <sup>56</sup>          | Depression | 85 <sup>A</sup> | 8.9                  | 5     | 41 <sup>A</sup> | 9.9                  | 6.3   | 0.18  | 0.19 |
| Tam et al. (2003) <sup>58</sup>           | Depression | 261             | 3.3                  | 2.9   | 255             | 3.5                  | 3     | 0.07  | 0.09 |
|                                           | Anxiety    | 261             | 3.8                  | 3.5   | 255             | 3.9                  | 3.5   | 0.03  | 0.09 |
| Toohill et al. (2014) <sup>59</sup>       | Depression | 101             | 45/101 <sup>B</sup>  |       | 97              | 50/97 <sup>B</sup>   |       | -0.15 | 0.16 |
| Waldenström et al. (2000) <sup>62</sup>   | Depression | 361             | 58/361 <sup>B</sup>  |       | 323             | 12/323 <sup>B</sup>  |       | -0.18 | 0.12 |
| Weis et al. (2017) <sup>63</sup>          | Depression | 121             | 4.03                 | 3.64  | 125             | 4.3                  | 4.3   | 0.07  | 0.13 |
|                                           | Anxiety    | 121             | 83.26                | 16.34 | 125             | 79.45                | 15.41 | -0.24 | 0.13 |
| Wickberg & Hwang (1996) <sup>64</sup>     | Depression | 15              | 3/15 <sup>B</sup>    |       | 16              | 12/16 <sup>B</sup>   |       | 1.37  | 0.46 |
| Wiggins et al. (2005) <sup>65</sup>       | Depression | 149             | 38/149 <sup>B</sup>  |       | 303             | 90/303 <sup>B</sup>  |       | 0.06  | 0.13 |
| Wiklund et al. (2010) <sup>66</sup>       | Depression | 33              | 8/33                 |       | 34              | 20/34                |       | 0.84  | 0.14 |
| Zlotnick et al. (2006) <sup>67</sup>      | Depression | 46              | 9.39                 | 7.42  | 40              | 10.1                 | 9.41  | 0.08  | 0.2  |
| Zlotnick et al. (2016) <sup>68</sup>      | Depression | 101             | 16/101 <sup>B</sup>  |       | 96              | 30/96 <sup>B</sup>   |       | 0.47  | 0.19 |

- A. Effective sample sizes were calculated for cluster trials using intraclass correlation coefficient and average cluster size. <https://training.cochrane.org/handbook/current/chapter-23#section-23-1-4> For Barnes (2009) and MacArthur (2002) an ICC of 0.1 was reported for the sample size calculation. No ICC was reported for Morrell (2009); 0.1 was used as a conservative estimate. Taft (2011) reported an ICC of 0.04.
- B. Proportions were used to estimate standardized mean difference and standard error using the Campbell Collaboration Calculator: <http://www.campbellcollaboration.org/escalc/html/EffectSizeCalculator-SMD10.php>
- C. Mean in the table was calculated from median reported in the study, which was converted into a mean value using Vassar Statistics: [http://vassarstats.net/median\\_range.html](http://vassarstats.net/median_range.html)
- D. In the original paper, standard errors were provided instead of means. Standard errors were used with samples sizes and means to calculate the SMD using the Campbell Collaboration Calculator: <http://www.campbellcollaboration.org/escalc/html/EffectSizeCalculator-SMD10.php>
- E. Standard deviations were not provided. These were calculated using the RevMan calculator: <https://training.cochrane.org/resource/revman-calculator>

**eFigure 2. Forest Plot Examining a Subgroup Analysis of Outcome Tool (Diagnostic vs Self-Assessment)**

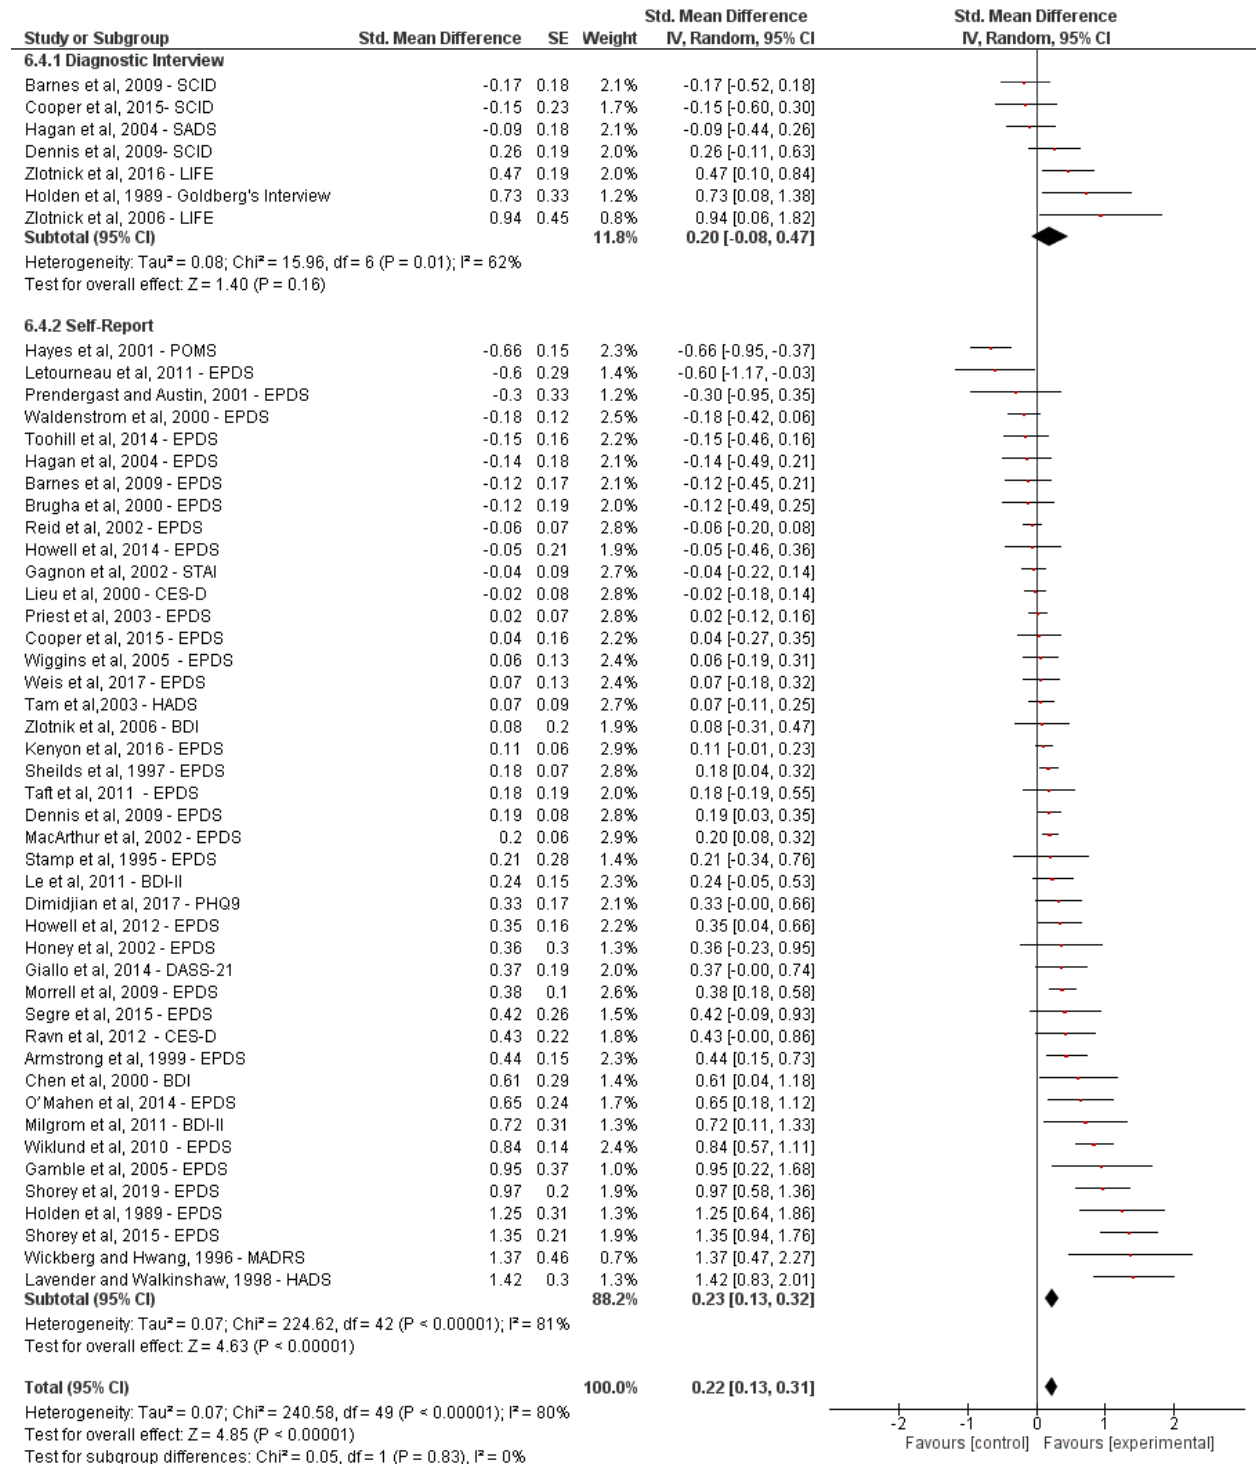

**eFigure 3. Forest Plot Examining a Subgroup Analysis of Age (Mixed Age vs Adult)**

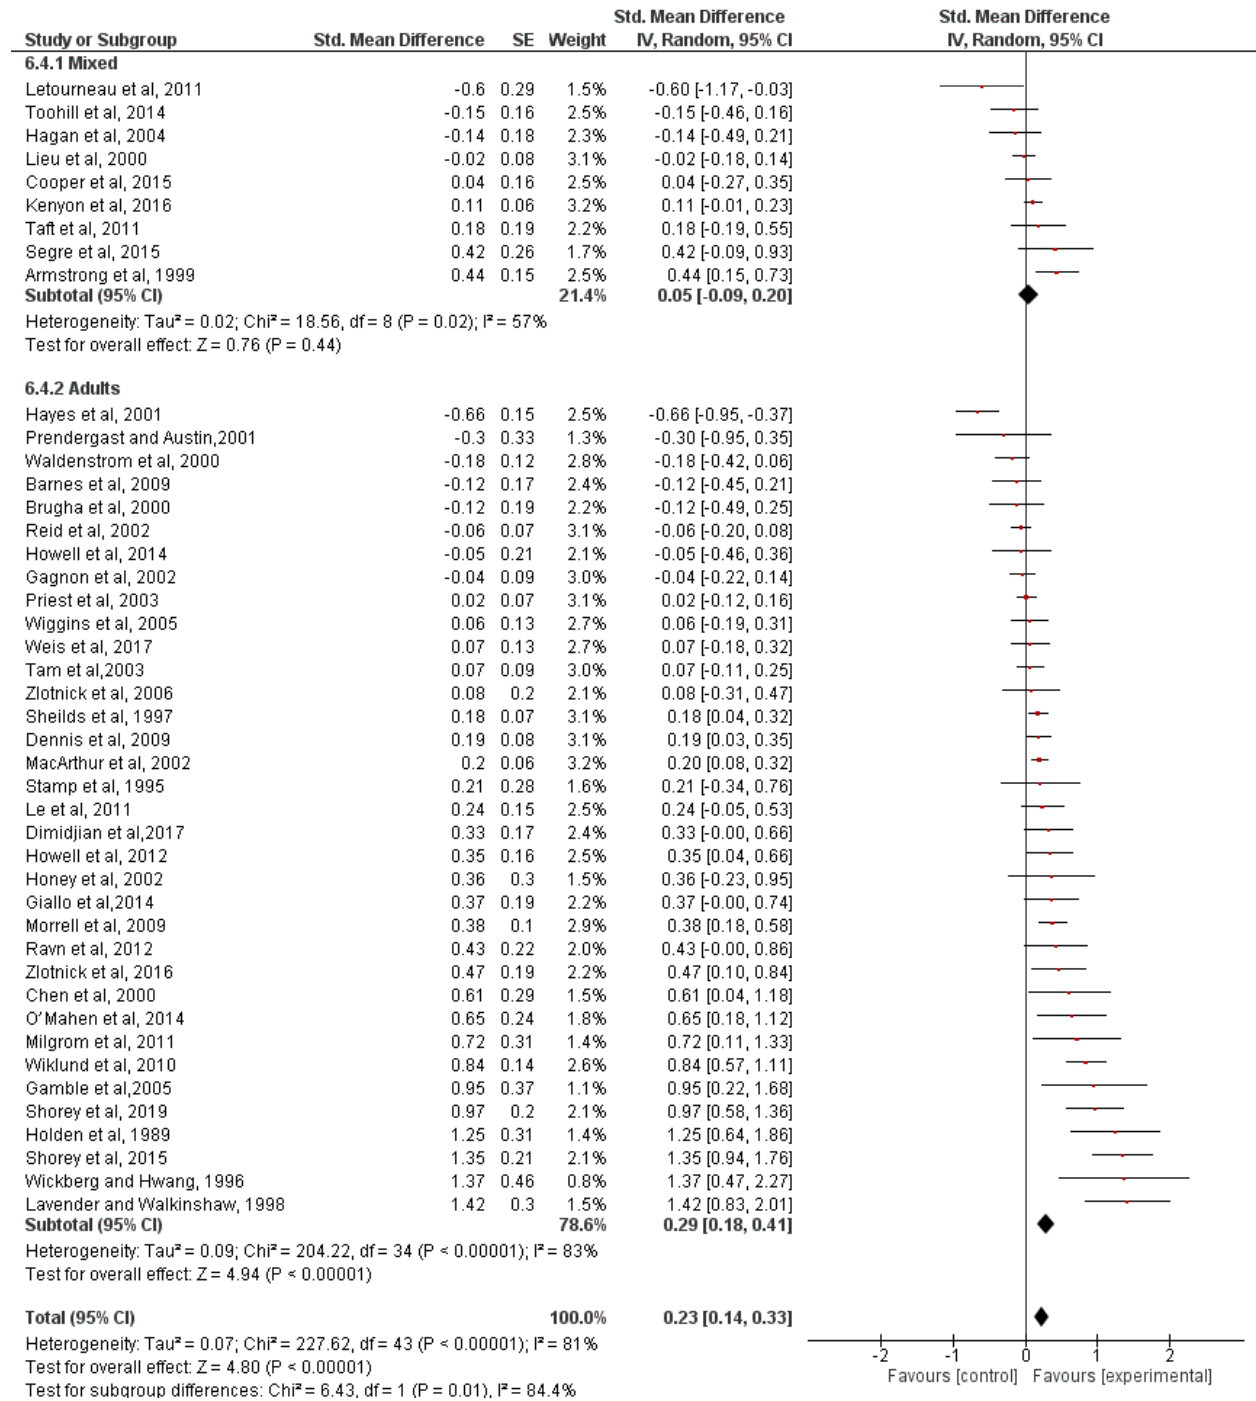

## eAppendix. Leave-One-Out Analyses

In the leave-one-out analyses, removal of the depression treatment trial with the largest effect size<sup>64</sup> resulted in a SMD of 0.34 (95% CI = 0.14 to 0.55,  $I^2=67%$ ); the removal of the depression treatment trial with the smallest effect size<sup>33</sup> resulted in a SMD of 0.44 (95% CI = 0.24 to 0.63,  $I^2=62%$ ). Removal of the depression treatment trial with the largest<sup>38</sup> and smallest<sup>42</sup> sample size resulted in an SMD of 0.39 (95% CI = 0.15 to 0.64,  $I^2=71%$ ) and 0.42 (95% CI = 0.21 to 0.63,  $I^2=68%$ ), respectively. The removal of the depression prevention trial with the largest<sup>30</sup> and smallest<sup>21</sup> effect size resulted in a SMD of 0.16 (95% CI = 0.06 to 0.27,  $I^2=82%$ ) and SMD of 0.22 (95% CI = 0.11 to 0.32,  $I^2=81%$ ), respectively. Removal of the depression prevention trial with the largest<sup>36</sup> and smallest<sup>66</sup> sample size resulted in an SMD of 0.19 (95% CI = 0.07 to 0.31,  $I^2=84%$ ) and 0.16 (95% CI = 0.06 to 0.27,  $I^2=81%$ ), respectively.

Removal of the trial with the biggest effect size<sup>16</sup> that assessed anxiety treatment resulted in a SMD of 0.31 (95% CI = 0.06 to 0.56,  $I^2=74%$ ); removal of the trial with the smallest effect size<sup>15</sup> that assessed anxiety treatment resulted in a SMD of 0.40 (95% CI = 0.25 to 0.56,  $I^2=0%$ ). Removal of the anxiety treatment trial with the largest<sup>15</sup> and smallest<sup>40</sup> sample size resulted in a SMD of 0.40 (95% CI = 0.25 to 0.56,  $I^2=0%$ ) and 0.29 (95% CI = 0.03 to 0.56,  $I^2=72%$ ), respectively. Removal of the anxiety prevention trial with the largest<sup>63</sup> and smallest<sup>30</sup> effect sizes resulted in a SMD of 0.12 (95% CI = -0.14 to 0.38,  $I^2=82%$ ) and 0.46 (95% CI = 0.08 to 0.84,  $I^2=88%$ ), respectively. Removal of the anxiety prevention trial with the largest<sup>10</sup> and smallest<sup>30</sup> sample size resulted in a SMD of 0.41 (95% CI = 0.11 to 0.92,  $I^2=91%$ ) and 0.12 (95% CI = -0.14 to 0.38,  $I^2=82%$ ), respectively.



## eReferences

1. Armstrong K, Fraser J, Dadds M, Morris J. A randomized, controlled trial of nurse home visiting to vulnerable families with newborns. *Journal of paediatrics and child health*. 1999;35(3):237-244.
2. Armstrong K, Morris J. Promoting secure attachment, maternal mood and child health in a vulnerable population: a randomized controlled trial. *Journal of paediatrics and child health*. 2000;36(6):555-562.
3. Barnes J, Senior R, MacPherson K. The utility of volunteer home-visiting support to prevent maternal depression in the first year of life. *Child: care, health and development*. 2009;35(6):807-816.
4. Brugha TS, Wheatley S, Taub NA, et al. Pragmatic randomized trial of antenatal intervention to prevent post-natal depression by reducing psychosocial risk factors. *Psychological medicine*. 2000;30(6):1273-1281.
5. Brugha TS, Sharp H, Cooper S-A, et al. The Leicester 500 Project. Social support and the development of postnatal depressive symptoms, a prospective cohort survey. *Psychological medicine*. 1998;28(1):63-79.
6. Chen C-H, Tseng Y-F, Chou F-H, Wang S-Y. Effects of support group intervention in postnatally distressed women: A controlled study in Taiwan. *Journal of psychosomatic research*. 2000;49(6):395-399.
7. Chen C-H, Wu H-Y, Tseng Y-F, Chou F-H, Wang S-Y. Psychosocial aspects of Taiwanese postpartum depression phenomenological approach: a preliminary report. *The Kaohsiung journal of medical sciences*. 1999;15(1):44-51.
8. Cooper PJ, De Pascalis L, Woolgar M, Romaniuk H, Murray L. Attempting to prevent postnatal depression by targeting the mother–infant relationship: a randomised controlled trial. *Primary health care research & development*. 2015;16(4):383-397.
9. Cooper PJ, Murray L, Wilson A, Romaniuk H. Controlled trial of the short-and long-term effect of psychological treatment of post-partum depression: I. Impact on maternal mood. *The British Journal of Psychiatry*. 2003;182(5):412-419.
10. Dennis C-L, Hodnett E, Kenton L, et al. Effect of peer support on prevention of postnatal depression among high risk women: multisite randomised controlled trial. *Bmj*. 2009;338:a3064.
11. Dennis C-L. The effect of peer support on postpartum depression: a pilot randomized controlled trial. *The Canadian Journal of Psychiatry*. 2003;48(2):115-124.
12. Dimidjian S, Goodman SH, Sherwood NE, et al. A pragmatic randomized clinical trial of behavioral activation for depressed pregnant women. *Journal of Consulting and Clinical Psychology*. 2017;85(1):26.
13. Field T, Diego M, Delgado J, Medina L. Peer support and interpersonal psychotherapy groups experienced decreased prenatal depression, anxiety and cortisol. *Early human development*. 2013;89(9):621-624.
14. Field T, Deeds O, Diego M, et al. Benefits of combining massage therapy with group interpersonal psychotherapy in prenatally depressed women. *Journal of bodywork and movement therapies*. 2009;13(4):297-303.
15. Gagnon AJ, Dougherty G, Jimenez V, Leduc N. Randomized trial of postpartum care after hospital discharge. *Pediatrics*. 2002;109(6):1074-1080.
16. Gamble J, Creedy D, Moyle W, Webster J, McAllister M, Dickson P. Effectiveness of a counseling intervention after a traumatic childbirth: a randomized controlled trial. *Birth*. 2005;32(1):11-19.

17. Gamble J, Creedy DK. A counselling model for postpartum women after distressing birth experiences. *Midwifery*. 2009;25(2):e21-e30.
18. Giallo R, Cooklin A, Dunning M, Seymour M. The efficacy of an intervention for the management of postpartum fatigue. *Journal of Obstetric, Gynecologic & Neonatal Nursing*. 2014;43(5):598-613.
19. Dunning M, Seymour M, Cooklin A, Giallo R. Wide Awake Parenting: study protocol for a randomised controlled trial of a parenting program for the management of post-partum fatigue. *BMC public health*. 2013;13(1):26.
20. Hagan R, Evans SF, Pope S. Preventing postnatal depression in mothers of very preterm infants: a randomised controlled trial. *BJOG: An International Journal of Obstetrics & Gynaecology*. 2004;111(7):641-647.
21. Hayes BA, Muller R, Bradley BS. Perinatal depression: a randomized controlled trial of an antenatal education intervention for primiparas. *Birth*. 2001;28(1):28-35.
22. Holden JM, Sagovsky R, Cox JL. Counselling in a general practice setting: controlled study of health visitor intervention in treatment of postnatal depression. *BMJ*. 1989;298(6668):223-226.
23. Holden J. Counselling: Instructions to Primary Care Workers. I: J. Cox (red) *Postnatal Depression: A Guide for Health Professionals Edinburgh: Churchill Livingstone*. 1986.
24. Honey KL, Bennett P, Morgan M. A brief psycho-educational group intervention for postnatal depression. *British Journal of Clinical Psychology*. 2002;41(4):405-409.
25. Howell EA, Bodnar-Deren S, Balbierz A, et al. An intervention to reduce postpartum depressive symptoms: a randomized controlled trial. *Archives of women's mental health*. 2014;17(1):57-63.
26. Howell EA, Balbierz A, Wang J, Parides M, Zlotnick C, Leventhal H. Reducing postpartum depressive symptoms among black and Latina mothers: a randomized controlled trial. *Obstetrics and gynecology*. 2012;119(5):942.
27. Kenyon S, Jolly K, Hemming K, et al. Lay support for pregnant women with social risk: a randomised controlled trial. *BMJ open*. 2016;6(3):e009203.
28. Kenyon S, Jolly K, Hemming K, et al. Evaluation of Lay Support in Pregnant women with Social risk (ELSIPS): a randomised controlled trial. *BMC pregnancy and childbirth*. 2012;12(1):11.
29. Kenyon S, Hewison A, Dann S-A, et al. The design and implementation of an obstetric triage system for unscheduled pregnancy related attendances: a mixed methods evaluation. *BMC pregnancy and childbirth*. 2017;17(1):309.
30. Lavender T, Walkinshaw SA, Midwife TLiAR, Stephen Walkinshaw is a Consultant in Feto-Maternal Medicine at the Liverpool Women's Hospital M, England. Can midwives reduce postpartum psychological morbidity? A randomized trial. *Birth*. 1998;25(4):215-219.
31. Le H-N, Perry DF, Stuart EA. Randomized controlled trial of a preventive intervention for perinatal depression in high-risk Latinas. *Journal of consulting and clinical psychology*. 2011;79(2):135.
32. Muñoz RF, Le H-N, Ippen CG, et al. Prevention of postpartum depression in low-income women: Development of the Mamás y Bebés/Mothers and Babies Course. *Cognitive and Behavioral Practice*. 2007;14(1):70-83.
33. Letourneau N, Stewart M, Dennis CL, Hegadoren K, Duffett-Leger L, Watson B. Effect of home-based peer support on maternal–infant interactions among women with postpartum depression: A randomized, controlled trial. *International journal of mental health nursing*. 2011;20(5):345-357.
34. Lieu TA, Braveman PA, Escobar GJ, Fischer AF, Jensvold NG, Capra AM. A randomized comparison of home and clinic follow-up visits after early postpartum hospital discharge. *Pediatrics*. 2000;105(5):1058-1065.

35. Escobar GJ, Braveman PA, Ackerson L, et al. A randomized comparison of home visits and hospital-based group follow-up visits after early postpartum discharge. *Pediatrics*. 2001;108(3):719-727.
36. MacArthur C, Winter H, Bick D, et al. Effects of redesigned community postnatal care on womens' health 4 months after birth: a cluster randomised controlled trial. *The lancet*. 2002;359(9304):378-385.
37. Milgrom J, Holt CJ, Gemmill AW, et al. Treating postnatal depressive symptoms in primary care: a randomised controlled trial of GP management, with and without adjunctive counselling. *BMC Psychiatry*. 2011;11(1):95.
38. Morrell CJ, Slade P, Warner R, et al. Clinical effectiveness of health visitor training in psychologically informed approaches for depression in postnatal women: pragmatic cluster randomised trial in primary care. *BMJ*. 2009;338:a3045.
39. Morrell CJ, Warner R, Slade P, et al. Psychological interventions for postnatal depression: cluster randomised trial and economic evaluation. The PoNDER trial. *Health Technol Assess*. 2009;13(30):iii-iv, xi-xiii, 1-153.
40. O'Mahen H, Richards D, Woodford J, et al. Netmums: a phase II randomized controlled trial of a guided Internet behavioural activation treatment for postpartum depression. *Psychological medicine*. 2014;44(08):1675-1689.
41. O'Mahen H, Fedock G, Henshaw E, Himle JA, Forman J, Flynn HA. Modifying CBT for perinatal depression: what do women want?: a qualitative study. *Cognitive and Behavioral Practice*. 2012;19(2):359-371.
42. Prendergast J, Austin M-P. Early Childhood Nurse-Delivered Cognitive Behavioural Counselling for Post-Natal Depression. *Australasian Psychiatry*. 2001;9(3):255-259.
43. Priest SR, Henderson J, Evans SF, Hagan R. Stress debriefing after childbirth: a randomised controlled trial. *Medical Journal of Australia*. 2003;178(11):542-545.
44. Ravn IH, Smith L, Smeby NA, et al. Effects of early mother–infant intervention on outcomes in mothers and moderately and late preterm infants at age 1 year: A randomized controlled trial. *Infant Behavior and Development*. 2012;35(1):36-47.
45. Reid M, Glazener C, Murray GD, Taylor GS. A two-centred pragmatic randomised controlled trial of two interventions of postnatal support. *Bjog*. 2002;109(10):1164-1170.
46. Saisto T, Salmela-Aro K, Nurmi JE, Könönen T, Halmesmäki E. A randomized controlled trial of intervention in fear of childbirth. *Obstet Gynecol*. 2001;98(5 Pt 1):820-826.
47. Segre LS, Brock RL, O'Hara MW. Depression treatment for impoverished mothers by point-of-care providers: A randomized controlled trial. *Journal of consulting and clinical psychology*. 2015;83(2):314.
48. Brock RL, O'Hara MW, Segre LS. Depression Treatment by Non-Mental-Health Providers: Incremental Evidence for the Effectiveness of Listening Visits. *American journal of community psychology*. 2017;59(1-2):172-183.
49. Shields N, Reid M, Cheyne H, et al. Impact of midwife-managed care in the postnatal period: An exploration of psychosocial outcomes. *Journal of Reproductive and Infant Psychology*. 1997;15(2):91-108.
50. Turnbull D, Reid M, McGinley MC, Shields NR. Changes in midwives' attitudes to their professional role following the implementation of the midwifery development unit. *Midwifery*. 1995;11(3):110-119.
51. Shorey S, Chan SW, Chong YS, He HG. A randomized controlled trial of the effectiveness of a postnatal psychoeducation programme on self-efficacy, social support and postnatal depression among primiparas. *J Adv Nurs*. 2015;71(6):1260-1273.

52. Shorey S, Chan WC, Chong YS, He HG. A randomized controlled trial of the effectiveness of a postnatal psychoeducation programme on outcomes of primiparas: study protocol. *J Adv Nurs*. 2015;71(1):193-203.
53. Shorey S, Chee CYI, Ng ED, Lau Y, Dennis CL, Chan YH. Evaluation of a Technology-Based Peer-Support Intervention Program for Preventing Postnatal Depression (Part 1): Randomized Controlled Trial. *J Med Internet Res*. 2019;21(8):e12410.
54. Shorey S, Chee C, Chong YS, Ng ED, Lau Y, Dennis CL. Evaluation of Technology-Based Peer Support Intervention Program for Preventing Postnatal Depression: Protocol for a Randomized Controlled Trial. *JMIR Res Protoc*. 2018;7(3):e81.
55. Stamp GE, Williams AS, Crowther CA. Evaluation of antenatal and postnatal support to overcome postnatal depression: a randomized, controlled trial. *Birth*. 1995;22(3):138-143.
56. Taft AJ, Small R, Hegarty KL, Watson LF, Gold L, Lumley JA. Mothers' AdvocateS In the Community (MOSAIC)- non-professional mentor support to reduce intimate partner violence and depression in mothers: a cluster randomised trial in primary care. *BMC Public Health*. 2011;11(1):178.
57. Taft AJ, Small R, Hegarty KL, Lumley J, Watson LF, Gold L. MOSAIC (MOthers' Advocates In the Community): protocol and sample description of a cluster randomised trial of mentor mother support to reduce intimate partner violence among pregnant or recent mothers. *BMC Public Health*. 2009;9:159.
58. Tam WH, Lee DT, Chiu HF, Ma KC, Lee A, Chung TK. A randomised controlled trial of educational counselling on the management of women who have suffered suboptimal outcomes in pregnancy. *Bjog*. 2003;110(9):853-859.
59. Toohill J, Fenwick J, Gamble J, et al. A randomized controlled trial of a psycho-education intervention by midwives in reducing childbirth fear in pregnant women. *Birth*. 2014;41(4):384-394.
60. Fenwick J, Gamble J, Creedy DK, et al. Study protocol for reducing childbirth fear: a midwife-led psycho-education intervention. *BMC pregnancy and childbirth*. 2013;13:190-190.
61. Fenwick J, Toohill J, Gamble J, et al. Effects of a midwife psycho-education intervention to reduce childbirth fear on women's birth outcomes and postpartum psychological wellbeing. *BMC pregnancy and childbirth*. 2015;15:284-284.
62. Waldenström U, Brown S, McLachlan H, Forster D, Brennecke S. Does team midwife care increase satisfaction with antenatal, intrapartum, and postpartum care? A randomized controlled trial. *Birth*. 2000;27(3):156-167.
63. Weis KL, Lederman RP, Walker KC, Chan W. Mentors Offering Maternal Support Reduces Prenatal, Pregnancy-Specific Anxiety in a Sample of Military Women. *J Obstet Gynecol Neonatal Nurs*. 2017;46(5):669-685.
64. Wickberg B, Hwang CP. Counselling of postnatal depression: A controlled study on a population based Swedish sample. *Journal of Affective Disorders*. 1996;39(3):209-216.
65. Wiggins M, Oakley A, Roberts I, et al. Postnatal support for mothers living in disadvantaged inner city areas: a randomised controlled trial. *Journal of Epidemiology and Community Health*. 2005;59(4):288-295.
66. Wiklund I, Mohlkert P, Edman G. Evaluation of a brief cognitive intervention in patients with signs of postnatal depression: a randomized controlled trial. *Acta Obstet Gynecol Scand*. 2010;89(8):1100-1104.
67. Zlotnick C, Miller IW, Pearlstein T, Howard M, Sweeney P. A preventive intervention for pregnant women on public assistance at risk for postpartum depression. *Am J Psychiatry*. 2006;163(8):1443-1445.

68. Zlotnick C, Tzilos G, Miller I, Seifer R, Stout R. Randomized controlled trial to prevent postpartum depression in mothers on public assistance. *Journal of affective disorders*. 2016;189:263-268.
